# Supplementary material for: Evolution, Expression and Functional Analysis of Cultivated Allotetraploid Cotton DIR Genes
Source: Research Square preprint supplement (doi:10.21203/rs.3.rs-100138/v1), 2020-11-04
Supplement: Supplementary file 1 [file be579e2e2780d9f3369654fc.xlsx]

## Sheet: Table S3
Supplementary Table 3. List of DIR genes used in the phylogenetic tree.
Gossypium barbadense			Gossypium hirsutum			Arabidopsis thaliana			Linum usitatissimum			Oryza sativa			Picea
Gene name	Accession No.		Gene name	Accession No.		Gene name	Accession No.		Gene name	Accession No.		Gene name	Accession No.		Gene name	Accession No.
GbDIR1	GB_A01G0031		GhDIR1	GH_A01G0033		AtDIR1	AT5G42510		LuDIR1	Lus10032331		OsDIR1	LOC_Os01g06250		PDIR1	ABD52112.1
GbDIR2	GB_A01G0405		GhDIR2	GH_A01G0414		AtDIR2	AT5G42500		LuDIR2	Lus10024715		OsDIR2	LOC_Os01g24960		PDIR2	ABD52113.1
GbDIR3	GB_A01G0457		GhDIR3	GH_A01G0465		AtDIR3	AT5G49040		LuDIR3	Lus10024714		OsDIR3	LOC_Os01g25030		PDIR3	ABD52114.1
GbDIR4	GB_A01G0458		GhDIR4	GH_A01G0466		AtDIR4	AT2G21110		LuDIR4	Lus10017538		OsDIR4	LOC_Os01g26340		PDIR4	ABD52115.1
GbDIR5	GB_A01G0460		GhDIR5	GH_A01G0468		AtDIR5	AT1G64160		LuDIR5	Lus10028749		OsDIR5	LOC_Os03g05030		PDIR5	ABD52116.1
GbDIR6	GB_A01G1875		GhDIR6	GH_A01G1770		AtDIR6	AT4G23690		LuDIR6	Lus10017539		OsDIR6	LOC_Os03g17220		PDIR6	ABD52117.1
GbDIR7	GB_A01G1877		GhDIR7	GH_A01G1771		AtDIR7	AT3G13650		LuDIR7	Lus10005062		OsDIR7	LOC_Os03g28190		PDIR7	ABD52118.1
GbDIR8	GB_A01G1878		GhDIR8	GH_A01G1772		AtDIR8	AT3G13662		LuDIR8	Lus10027834		OsDIR8	LOC_Os03g59440		PDIR8	ABD52119.1
GbDIR9	GB_A01G1881		GhDIR9	GH_A01G1774		AtDIR9	AT2G39430		LuDIR9	Lus10025065		OsDIR9	LOC_Os04g57130		PDIR9	ABD52120.1
GbDIR10	GB_A01G1882		GhDIR10	GH_A02G1092		AtDIR10	AT2G28670		LuDIR10	Lus10034478		OsDIR10	LOC_Os07g01600		PDIR10	ABD52121.1
GbDIR11	GB_A02G1109		GhDIR11	GH_A02G1159		AtDIR11	AT1G22900		LuDIR11	Lus10025064		OsDIR11	LOC_Os07g01620		PDIR11	ABD52122.1
GbDIR12	GB_A02G1171		GhDIR12	GH_A02G1160		AtDIR12	AT4G11180		LuDIR12	Lus10034479		OsDIR12	LOC_Os07g01660		PDIR12	ABD52123.1
GbDIR13	GB_A02G1172		GhDIR13	GH_A03G0486		AtDIR13	AT4G11190		LuDIR13	Lus10034480		OsDIR13	LOC_Os07g01680		PDIR13	ABD52124.1
GbDIR14	GB_A03G0473		GhDIR14	GH_A03G2271		AtDIR14	AT4G11210		LuDIR14	Lus10025063		OsDIR14	LOC_Os07g42520		PDIR14	ABD52125.1
GbDIR15	GB_A03G2361		GhDIR15	GH_A04G0071		AtDIR15	AT4G38700		LuDIR15	Lus10034482		OsDIR15	LOC_Os07g42570		PDIR15	ABD52126.1
GbDIR16	GB_A04G0072		GhDIR16	GH_A04G0072		AtDIR16	AT3G24020		LuDIR16	Lus10025067		OsDIR16	LOC_Os07g44250		PDIR16	ABD52127.1
GbDIR17	GB_A04G0073		GhDIR17C	GH_A04G0073		AtDIR17	AT3G58090		LuDIR17	Lus10034473		OsDIR17	LOC_Os07g44260		PDIR17	ABD52128.1
GbDIR18	GB_A04G0074		GhDIR18	GH_A04G0074		AtDIR18	AT4G13580		LuDIR18	Lus10034476		OsDIR18	LOC_Os07g44280		PDIR18	ABD52129.1
GbDIR19	GB_A04G0075		GhDIR19	GH_A04G0075		AtDIR19	AT1G58170		LuDIR19	Lus10032939		OsDIR19	LOC_Os07g44370		PDIR19	ABD52130.1
GbDIR20	GB_A04G0076		GhDIR20	GH_A04G0076		AtDIR20	AT1G55210		LuDIR20	Lus10029306		OsDIR20	LOC_Os07g44380		PDIR20	ABR27716.1
GbDIR21C	GB_A04G0078		GhDIR21C	GH_A04G0077		AtDIR21	AT1G65870		LuDIR21	Lus10016237		OsDIR21	LOC_Os07g44450		PDIR21	ABR27717.1
GbDIR22	GB_A04G0079		GhDIR22	GH_A04G0078		AtDIR22	AT3G13660		LuDIR22	Lus10039561		OsDIR22	LOC_Os07g44930		PDIR22	ABR27718.1
GbDIR23	GB_A04G1443		GhDIR23	GH_A04G0079		AtDIR23	AT2G21100		LuDIR23	Lus10042488		OsDIR23	LOC_Os08g26110		PDIR23	ABR27719.1
GbDIR24	GB_A04G1444		GhDIR24	GH_A04G0080		AtDIR24	AT3G55230		LuDIR24	Lus10026176		OsDIR24	LOC_Os08g26180		PDIR24	ABR27720.1
GbDIR25	GB_A04G1520		GhDIR25	GH_A04G1401		AtDIR25	AT1G07730		LuDIR25	Lus10017231		OsDIR25	LOC_Os08g26560		PDIR25	ABR27721.1
GbDIR26C	GB_A04G1549		GhDIR26	GH_A04G1402					LuDIR26	Lus10032310		OsDIR26	LOC_Os08g28790		PDIR26	ABR27722.1
GbDIR27	GB_A04G1551		GhDIR27	GH_A04G1470					LuDIR27	Lus10021084		OsDIR27	LOC_Os10g18760		PDIR27	ABR27723.1
GbDIR28	GB_A04G1553		GhDIR28	GH_A04G1499					LuDIR28	Lus10021083		OsDIR28	LOC_Os10g18820		PDIR28	ABR27724.1
GbDIR29	GB_A04G1844		GhDIR29	GH_A04G1500					LuDIR29	Lus10023689		OsDIR29	LOC_Os10g18870		PDIR29	ABR27725.1
GbDIR30N	GB_A05G2000		GhDIR30N	GH_A05G1971					LuDIR30	Lus10011767		OsDIR30	LOC_Os10g25870		PDIR30	ABR27726.1
GbDIR31	GB_A05G2984		GhDIR31	GH_A05G2936					LuDIR31	Lus10029585		OsDIR31	LOC_Os10g25900		PDIR31	ABR27727.1
GbDIR32	GB_A05G2988		GhDIR32	GH_A05G2938					LuDIR32	Lus10006317		OsDIR32	LOC_Os11g07670		PDIR32	ABR27728.1
GbDIR33C	GB_A05G3087		GhDIR33C	GH_A05G3044					LuDIR33	Lus10030318		OsDIR33	LOC_Os11g07680		PDIR33	ABR27729.1
GbDIR34	GB_A07G0406		GhDIR34	GH_A07G0413					LuDIR34	Lus10038298		OsDIR34	LOC_Os11g07690		PDIR34	ABR27730.1
GbDIR35	GB_A08G1272		GhDIR35	GH_A08G0156					LuDIR35	Lus10025804		OsDIR35	LOC_Os11g07710		PDIR35	ABR27731.1
GbDIR36	GB_A08G2643		GhDIR36	GH_A08G1196					LuDIR36	Lus10017228		OsDIR36	LOC_Os11g07740
GbDIR37	GB_A08G2645		GhDIR37	GH_A08G2528					LuDIR37	Lus10021082		OsDIR37	LOC_Os11g07770
GbDIR38C	GB_A09G2394		GhDIR38	GH_A09G2292					LuDIR38	Lus10030483		OsDIR38	LOC_Os11g07830
GbDIR39	GB_A10G0635		GhDIR39	GH_A10G0630					LuDIR39	Lus10018340		OsDIR39	LOC_Os11g10800
GbDIR40	GB_A10G1356		GhDIR40	GH_A10G1296					LuDIR40	Lus10016231		OsDIR40	LOC_Os11g10850
GbDIR41N	GB_A10G2475		GhDIR41N	GH_A10G2322					LuDIR41	Lus10000376		OsDIR41	LOC_Os11g10870
GbDIR42	GB_A10G2476		GhDIR42	GH_A10G2323					LuDIR42	Lus10029312		OsDIR42	LOC_Os11g27620
GbDIR43	GB_A10G2477		GhDIR43	GH_A10G2324					LuDIR43	Lus10003301		OsDIR43	LOC_Os11g40180
GbDIR44	GB_A11G2160		GhDIR44	GH_A10G2565					LuDIR44	Lus10024684		OsDIR44	LOC_Os11g42500
GbDIR45	GB_A11G3205		GhDIR45C	GH_A10G2566								OsDIR45	LOC_Os11g42550
GbDIR46	GB_A11G3207		GhDIR46	GH_A11G2125								OsDIR46	LOC_Os12g07580
GbDIR47	GB_A11G3419		GhDIR47	GH_A11G3135								OsDIR47	LOC_Os12g09720
GbDIR48	GB_A11G3422		GhDIR48	GH_A11G3136								OsDIR48	LOC_Os12g12600
GbDIR49	GB_A11G3425		GhDIR49	GH_A11G3332								OsDIR49	LOC_Os12g26380
GbDIR50	GB_A11G3653		GhDIR50	GH_A11G3336
GbDIR51	GB_A11G3654		GhDIR51	GH_A11G3591
GbDIR52	GB_A12G2120		GhDIR52	GH_A11G3592
GbDIR53	GB_A12G2623		GhDIR53	GH_A12G2034
GbDIR54	GB_A12G3000		GhDIR54	GH_A12G2524
GbDIR55	GB_A13G0135		GhDIR55	GH_A12G2901
GbDIR56	GB_A13G2564		GhDIR56	GH_A13G0137
GbDIR57	GB_D01G0031		GhDIR57	GH_A13G2413
GbDIR58	GB_D01G0433		GhDIR58	GH_D01G0032
GbDIR59	GB_D01G0479		GhDIR59	GH_D01G0405
GbDIR60	GB_D01G1975		GhDIR60	GH_D01G0456
GbDIR61	GB_D01G1977		GhDIR61	GH_D01G0457
GbDIR62N	GB_D01G1979		GhDIR62	GH_D01G0458
GbDIR63	GB_D01G1982		GhDIR63	GH_D01G0459
GbDIR64	GB_D03G0914		GhDIR64	GH_D01G1884
GbDIR65	GB_D03G0915		GhDIR65	GH_D01G1886
GbDIR66	GB_D03G0980		GhDIR66	GH_D01G1891
GbDIR67	GB_D03G1516		GhDIR67	GH_D02G2445
GbDIR68	GB_D04G1047		GhDIR68	GH_D03G0903
GbDIR69	GB_D04G1838		GhDIR69	GH_D03G0905
GbDIR70	GB_D04G1900		GhDIR70	GH_D03G0967
GbDIR71	GB_D04G1929		GhDIR71	GH_D03G1491
GbDIR72	GB_D04G1932		GhDIR72	GH_D04G1047
GbDIR73N	GB_D05G2025		GhDIR73	GH_D04G1748
GbDIR74	GB_D05G2967		GhDIR74C	GH_D04G1749
GbDIR75	GB_D05G2969		GhDIR75	GH_D04G1809
GbDIR76	GB_D05G2970		GhDIR76	GH_D04G1838
GbDIR77	GB_D07G0412		GhDIR77	GH_D04G1841
GbDIR78	GB_D08G0154		GhDIR78N	GH_D05G2009
GbDIR79	GB_D08G1416		GhDIR79	GH_D05G2959
GbDIR80	GB_D09G0187		GhDIR80	GH_D05G3051
GbDIR81	GB_D09G2242		GhDIR81	GH_D05G3987
GbDIR82	GB_D10G0663		GhDIR82	GH_D05G3988
GbDIR83	GB_D10G1582		GhDIR83	GH_D05G3989
GbDIR84N	GB_D10G2436		GhDIR84	GH_D07G0418
GbDIR85	GB_D10G2437		GhDIR85	GH_D08G0163
GbDIR86	GB_D10G2438		GhDIR86	GH_D08G1361
GbDIR87	GB_D10G2688		GhDIR87	GH_D09G0187
GbDIR88	GB_D10G2693		GhDIR88	GH_D09G0189
GbDIR89C	GB_D11G2354		GhDIR89	GH_D09G2228
GbDIR90	GB_D11G2355		GhDIR90	GH_D10G0671
GbDIR91	GB_D11G3209		GhDIR91	GH_D10G1584
GbDIR92	GB_D11G3210		GhDIR92N	GH_D10G2418
GbDIR93	GB_D11G3388		GhDIR93	GH_D10G2419
GbDIR94	GB_D11G3392		GhDIR94	GH_D10G2420
GbDIR95	GB_D11G3393		GhDIR95	GH_D10G2676
GbDIR96	GB_D11G3678		GhDIR96	GH_D11G2313
GbDIR97	GB_D11G3679		GhDIR97C	GH_D11G3166
GbDIR98	GB_D12G2114		GhDIR98	GH_D11G3167
GbDIR99	GB_D12G2629		GhDIR99	GH_D11G3342
GbDIR100	GB_D12G3008		GhDIR100	GH_D11G3343
GbDIR101	GB_D13G0132		GhDIR101	GH_D11G3344
GbDIR102	GB_D13G2493		GhDIR102C	GH_D11G3611
GbDIR103	GB_scaffold20222_objG0001		GhDIR103	GH_D11G3612
GbDIR104	GB_scaffold28243_objG0001		GhDIR104	GH_D12G2034
GbDIR105	GB_scaffold29846_objG0001		GhDIR105	GH_D12G2924
GbDIR106	GB_scaffold5871_objG0001		GhDIR106	GH_D13G0138
GbDIR107	GB_scaffold8704_objG0001		GhDIR107	GH_D13G2408
